# Supplementary material for: Substantial Decreases in NO2 Pollution Measured by Ground-Based Monitors in US Cities During COVID-19 Shutdowns from Reduced Transportation Volumes
Source: Preprints.org preprint supplement (doi:10.20944/preprints202011.0695.v1), 2020-11-27
Supplement: Supplementary file 1 [file supplementary]

**Supporting Information**

**Substantial decreases in NO2 emissions from reduced transportation volumes in US cities during COVID-19 shutdowns reveal health vulnerabilities of urban populations**

Asrah Heintzelman1,2, Vijay O. Lulla3, and Gabriel M. Filippelli1,2#

1Department of Earth Sciences, Indiana University-Purdue University Indianapolis (IUPUI)

2Environmental Resilience Institute, Indiana University

3Department of Geography, Indiana University-Purdue University Indianapolis (IUPUI)

#Corresponding author: [gfilippe@iu.edu](mailto:gfilippe@iu.edu)

| Location  (NO2 Sensors) | Jan  (ppb) | Mar  (ppb) | Apr  (ppb) | 5-yr Change  (Jan to Mar) | 5-yr Change  (Jan to Apr) |  |
| --- | --- | --- | --- | --- | --- | --- |
| LA | 22.01 | 16.60 | 13.68 | -24.57% | -37.85% |  |
| Indianapolis | 13.79 | 13.23 | 11.83 | -4.00% | -14.18% |  |
| San Francisco | 18.21 | 11.45 | 8.88 | -37.12% | -51.21% |  |
| Ft. Worth | 10.26 | 7.69 | 6.07 | -25.09% | -40.88% |  |
| Houston | 15.00 | 10.42 | 10.02 | -30.54% | -33.20% |  |
| San Antonio | 9.64 | 5.54 | 4.71 | -42.56% | -51.10% |  |
| Austin | 15.42 | 13.83 | 13.35 | -10.32% | -13.44% |  |
| Dallas | 12.57 | 8.73 | 7.25 | -30.61% | -42.34% |  |
| San Jose | 18.11 | 12.98 | 10.80 | -28.31% | -40.38% |  |
| San Diego | 15.32 | 12.93 | 11.41 | -15.64% | -25.51% |  |
| Queens-NY | 20.60 | 17.68 | 14.35 | -14.14% | -30.31% |  |

*Table S1. NO2 averages of January, March, and April from 2015-2019n*


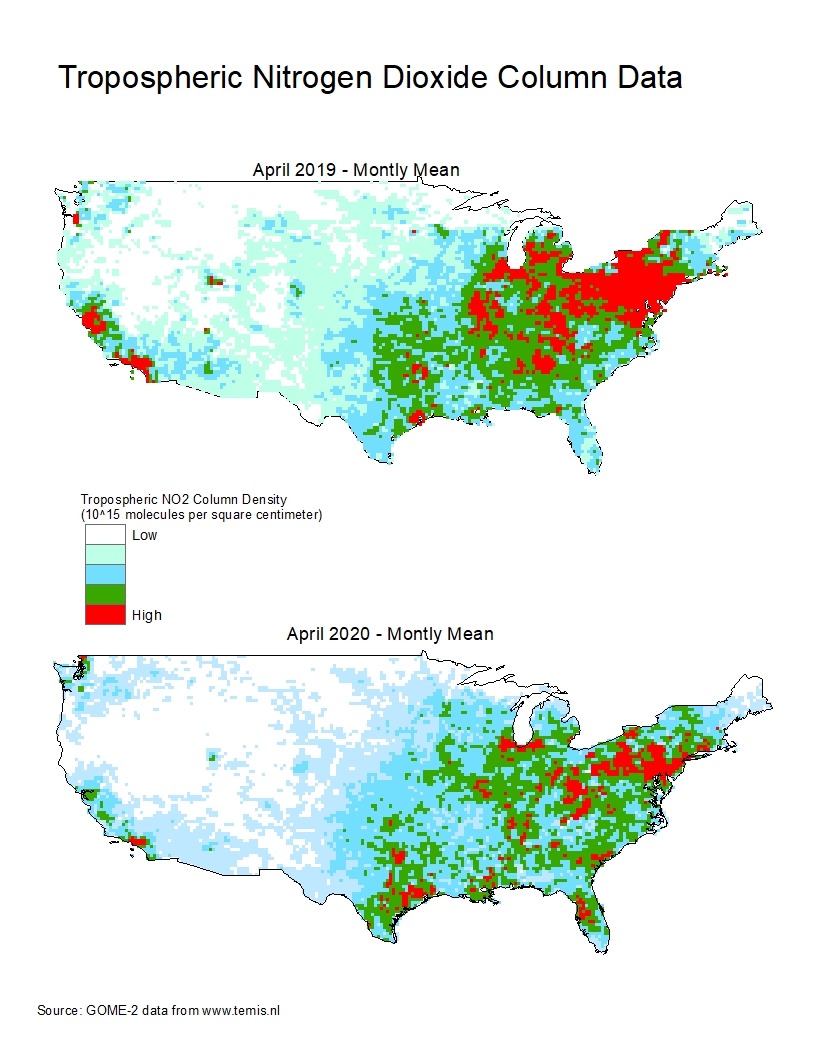


*Figure S1. NO2 averages from April in 2019 and 2020*

*Figure S2. NO2 averages from January, March, and April in 2020*

*Figure S3. VMT changes between January to March and January to April in 2020*

*Figure S4. NO2 and VMT percent changes between January and March in 2020*

*Figure S5. NO2 and VMT percent changes between January and April 2020*
